# Supplementary material
Source: PubMed Central journal article supplement (PMC2336867)
Supplement: JCI0833656sd.pdf [file JCI0833656sd.pdf]

**Supplementary Table 1. Clinical data of adult tumors (n=35).**

| <b>Variable</b>                    | <b>WHO°II</b> |
|------------------------------------|---------------|
| <b>Age</b>                         |               |
| Mean (years)                       | 31            |
| Range (years)                      | 19-67         |
| <b>Gender</b>                      |               |
| female                             | 14 (40%)      |
| male                               | 21 (60%)      |
| <b>Localization</b>                |               |
| infratentorial<br>(cerebellar)     | 6 (17%)       |
| supratentorial<br>(non-cerebellar) | 29 (83%)      |
| <b>Level of resection</b>          |               |
| complete                           | 24 (69%)      |
| subtotal                           | 10 (29%)      |
| Biopsy/partial                     | 1 (3%)        |
| <b>Recurrence</b>                  |               |
| recurrence                         | 9 (26%)       |
| no recurrence                      | 26 (74%)      |
| <b>Follow-up</b>                   |               |
| median (months)                    | 76            |
| <b>Total</b>                       | <b>35</b>     |

**Supplementary Table 2.** Minimally altered regions in low-grade astrocytomas.

| <i>Localization</i> | <i>Type of aberration</i> | <i>Count</i> | <i>Start Clone</i> | <i>End Clone</i> | <i>Size (Mb)</i> | <i>Candidate gene(s)</i> |
|---------------------|---------------------------|--------------|--------------------|------------------|------------------|--------------------------|
| 5p15.33-15.1        | gain                      | 6            | RP1-61C2           | RP11-21H5        | 15.3             | TERT, CTNND2             |
| 5p13.3-p12          | gain                      | 6            | RP11-113I22        | RP11-28I9        | 12.5             | SKP2, FBXO4              |
| 7p22                | gain                      | 7            | CTB-164D18         | RP11-745M18      | 2.42             | PDGFA, EIF3B             |
| 7q11.22-q11.23      | gain                      | 5            | RP11-358M3         | RP4-562A11       | 9.89             | BCL7B                    |
| 7q34                | gain                      | 30           | RP5-886O8          | RP4-726N20       | 0.97             | BRAF                     |
| 11p15.5             | gain                      | 7            | RP11-496I9         | RP11-113A6       | 2.4              | HRAS, IGF2               |
| 14q32.33            | gain                      | 4            | RP11-73M18         | RP11-521B24      | 1.85             | AKT1                     |
| 19p-p13.11          | gain                      | 4            | CTD-2108L15        | RP11-520G3       | 19.11            | MAP2K2, VAV1             |

**Supplementary Table 3.** List of candidate genes on chromosome 7q34 (139186224-140156951).

| <b>Symbol</b>      | <b>Gene Name</b>                                                             | <b>Unigene</b>   | <b>Function</b>                           |
|--------------------|------------------------------------------------------------------------------|------------------|-------------------------------------------|
| <i>TBXAS1</i>      | <i>THROMBOXANE A SYNTHASE 1</i>                                              | Hs.520757        | hemostasis                                |
| <i>PARP12</i>      | <i>poly (ADP-ribose) polymerase family, member 12</i>                        | Hs.602306        | unknown                                   |
| <i>JHDM1D</i>      | <i>jumonji C domain containing histone demethylase 1 homolog D</i>           | Hs.308710        | shromatin reorganisation                  |
| <i>SLC37A3</i>     | <i>solute carrier family 37 (glycerol-3-phosphate transporter), member 3</i> | Hs.446021        | solute carrier                            |
| <i>AK131347</i>    | <i>FLJ16367</i>                                                              |                  | unknown                                   |
| <i>RAB19B</i>      | <i>RAB19, member RAS oncogene family</i>                                     | Hs.583545        | signal transduction                       |
| <i>MKRN1</i>       | <i>makorin, ring finger protein, 1</i>                                       | Hs.490347        | transcriptional regulation                |
| <i>DENND2A</i>     | <i>DENN/MADD domain containing 2A</i>                                        | Hs.6385          | unknown                                   |
| <i>ADCK2</i>       | <i>aarF domain containing kinase 2</i>                                       | Hs.534141        | unknown                                   |
| <i>NDUFB2</i>      | <i>NADH dehydrogenase (ubiquinone) 1 beta subcomplex, 2</i>                  | Hs.655788        | respiratory chain                         |
| <i>AK098095</i>    | <i>FLJ36704</i>                                                              |                  | unknown                                   |
| <b><i>BRAF</i></b> | <b><i>v-raf murine sarcoma viral oncogene homolog B1</i></b>                 | <b>Hs.550061</b> | <b>proliferation, signal transduction</b> |

**Supplementary Table 4.** Primer sequences for mutational analysis and genomic sequencing of *BRAF*.

| <b>BRAF</b>    | <b>Forward Primer</b>       | <i>Reverse Primer</i>        |
|----------------|-----------------------------|------------------------------|
| Exon 6         | AAACAAGAGAGTAGATACGTCAGTTTC | AAGTGTAATAATGGTAGGTAGAAAAGAG |
| Exon 11        | TTCTGTTTGGCTTGACTTGAC       | ACTTGTCACAATGTCACCAC         |
| Exon 12        | AATTAGTAAAACACCCAAGAATG     | AGTTGCTACCACTGGGAACC         |
| Exon 14        | ACACCCCAAGTATGTTCTG         | AAATGCAGAAGAAAAAGTCAGG       |
| <b>Exon 15</b> | CCTAAACTCTTCATAATGCTTGC     | GTA ACTCAGCAGCATCTCAGG       |

**Supplementary Table 5.** Primer sequences for quantitative real-time PCR.

| <b>Gene</b>  | <b>Forward Primer</b>          | <i>Reverse Primer</i>    |
|--------------|--------------------------------|--------------------------|
| <i>BRAF</i>  | CTCGAGTGATGATTGGGAGATTCCTGATGG | CTGCTGAGGTGTAGGTGCTGTCAC |
| <i>CCND1</i> | AGCTGCTGCAAATGGAGC             | TTCACATCTGTGGCACAG       |
| <i>DCTN2</i> | CGCCATGGCGGACCCTAAAT           | TTGTCAGCTCCTCCGCATCGAA   |
| <i>PGK1</i>  | AAGTGAAGCTCGGAAAGCTTCTAT       | AGGGAAAAGATGCTTCTGGG     |
